# Supplementary material
Source: Springer Nature journal article supplement (https://www.springermedizin.de/resource/supplementary/13561_2011_26_MOESM1_ESM.pdf/9687308)

Patients

Orthopaedic  
Evaluation

In-Office Imaging  
("Make")

Imaging  
("Buy")

Orthopaedic  
Treatment

In-Office Therapy  
("Make")

Therapy  
("Buy")

Completed  
Episode

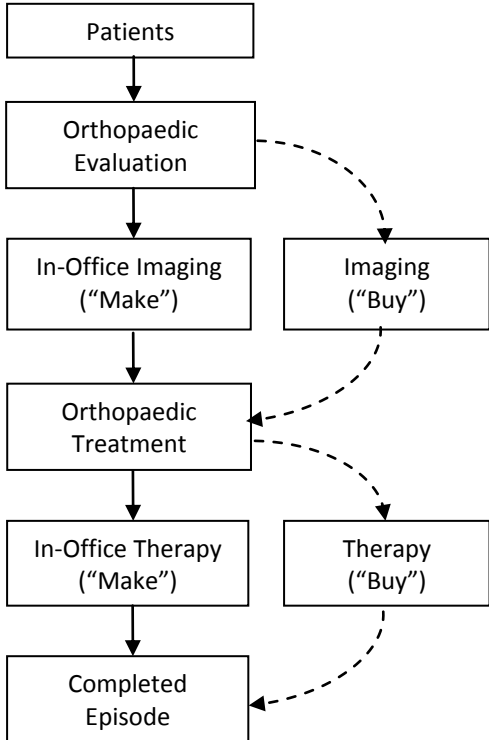

Supplement: MOESM1 [file 9687308]
